# Supplementary material
Source: PubMed Central journal article supplement (PMC4829466)
Supplement: NIHMS766191-supplement-1.pdf [file NIHMS766191-supplement-1.pdf]

## **INVENTORY OF SUPPLEMENTAL INFORMATION**

### **Supplemental Figures and Tables**

Figure S1, related to Figure 1.

Table S1, related to Figure 1.

Figure S2, related to Figure 3.

Table S2, related to Figure 4.

Figure S3, related to Figure 4.

Table S3, related to Figure 4. Provided as an Excel file.

Table S4, related to Figure 4. Provided as an Excel file.

Figure S4, related to Figure 5.

Figure S5, related to Figure 7.

Table S5, related to Figure 7. Provided as an Excel file.

### **Supplemental Experimental Procedures**

### **Supplemental References**
